# Supplementary material for: σ-Aromatic cyclic M3+ (M = Cu, Ag, Au) clusters and their complexation with dimethyl imidazol-2-ylidene, pyridine, isoxazole, furan, noble gases and carbon monoxide
Source: Royal Society of Chemistry journal article supplement (doi:10.1039/c5cp06282a), 2015-11-20
Supplement: c5cp06282a1.pdf [file c5cp06282a1.pdf]

# **$\sigma$ -Aromatic Cyclic $M_3^+$ ( $M = Cu, Ag, Au$ ) Clusters and their Complexation with Dimethyl imidazol-2-ylidene, Pyridine, Isoxazole, Furan, Noble Gas and Carbon Monoxide**

Sudip Pan, Ranajit Saha, Subhajit Mandal and Pratim K. Chattaraj\*

*Department of Chemistry and Center for Theoretical Studies,*

*Indian Institute of Technology, Kharagpur, 721302, India*

\*Corresponding author: [pkc@chem.iitkgp.ernet.in](mailto:pkc@chem.iitkgp.ernet.in)

## **Supporting Information**

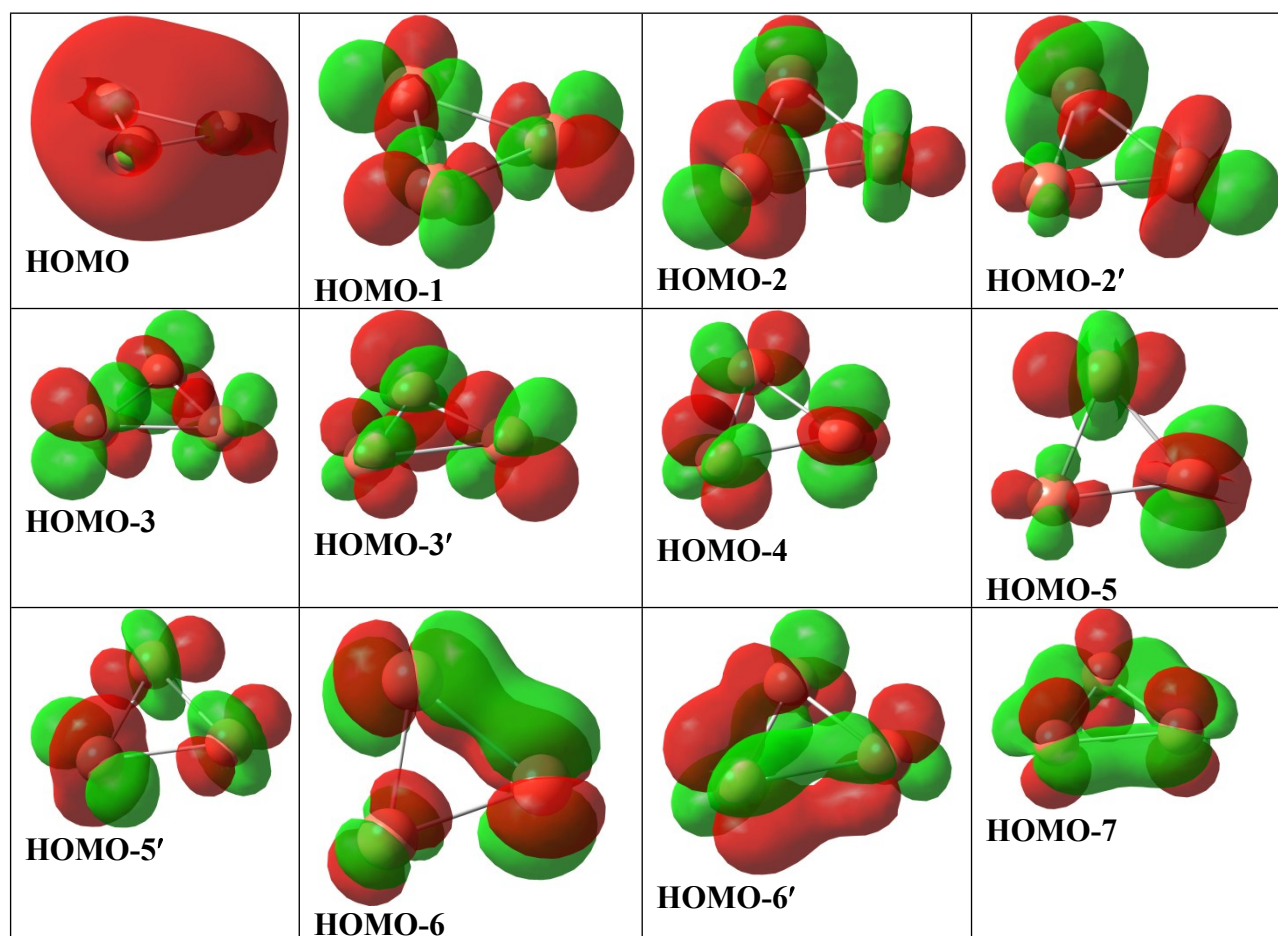

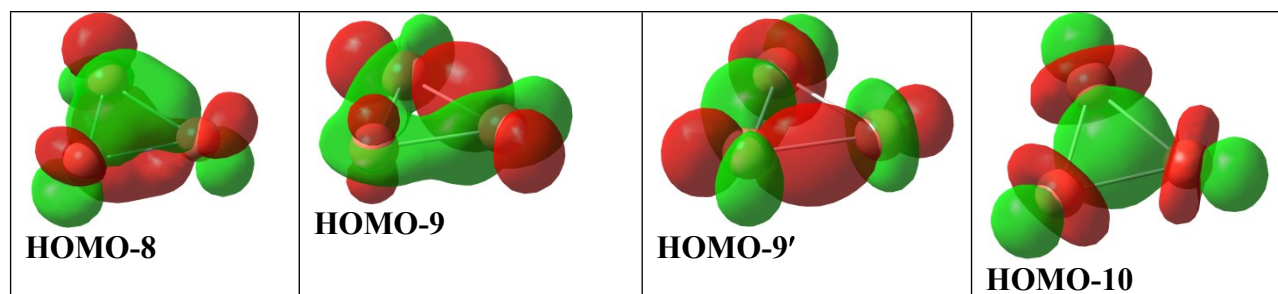

**Fig. 1-SI Occupied molecular orbitals of  $M_3^+$ .**

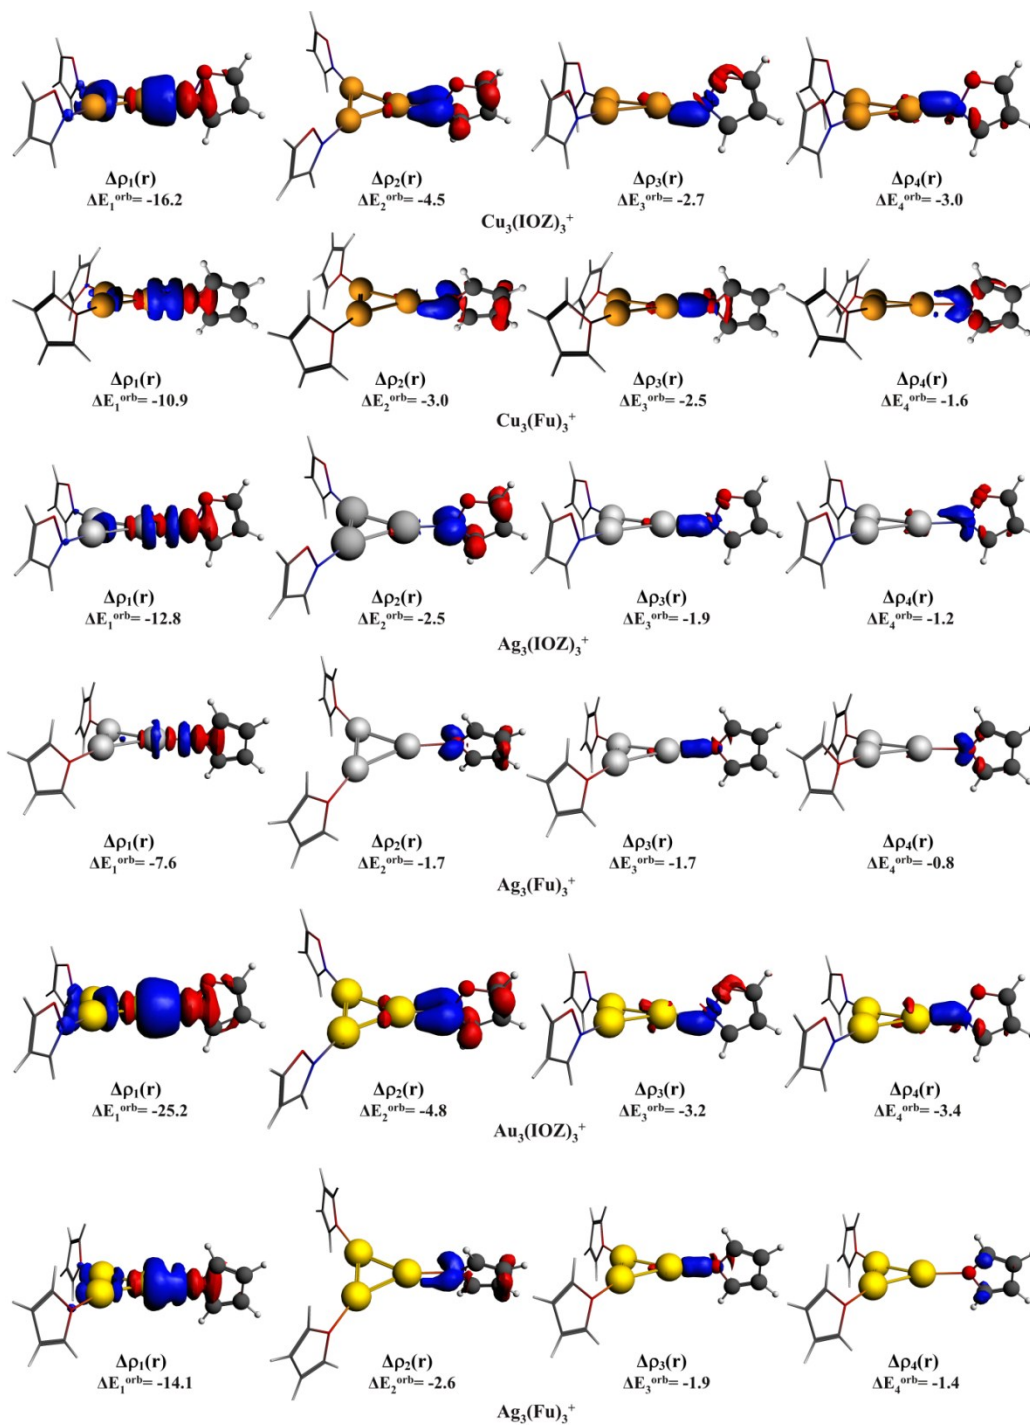

**Fig. 2-SI** The plots of deformation density ( $\Delta\rho(r)$ ) for  $\text{M}_3(\text{IOZ})_3^+$  and  $\text{M}_3(\text{Fu})_3^+$  complexes at the PBE-D3/TZ2P//M06-2X/def2-TZVP level.

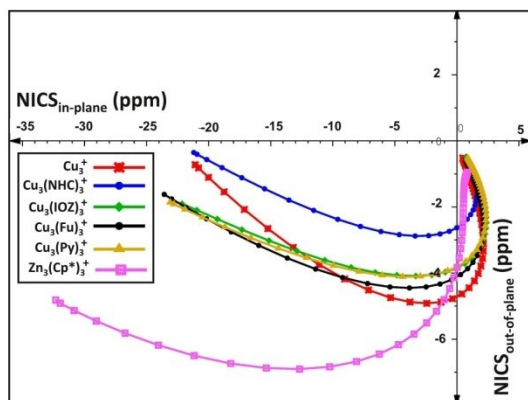

(a)

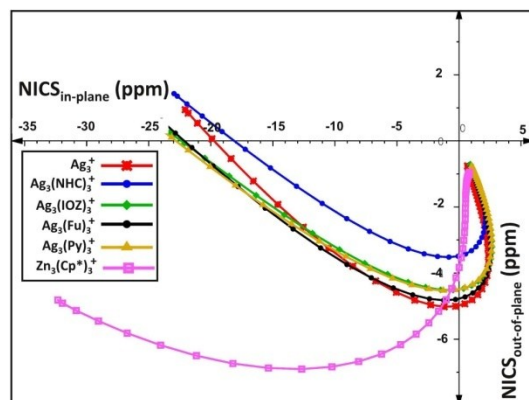

(b)

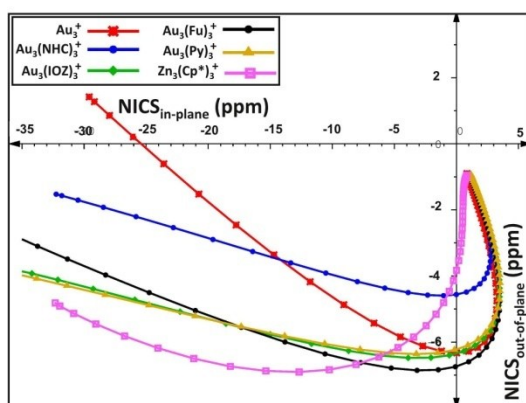

(c)

**Fig. 3-SI** FiPC-NICS plots for the  $M_3L_3^+$  complexes at the M06-2X/def2-TZVP level.

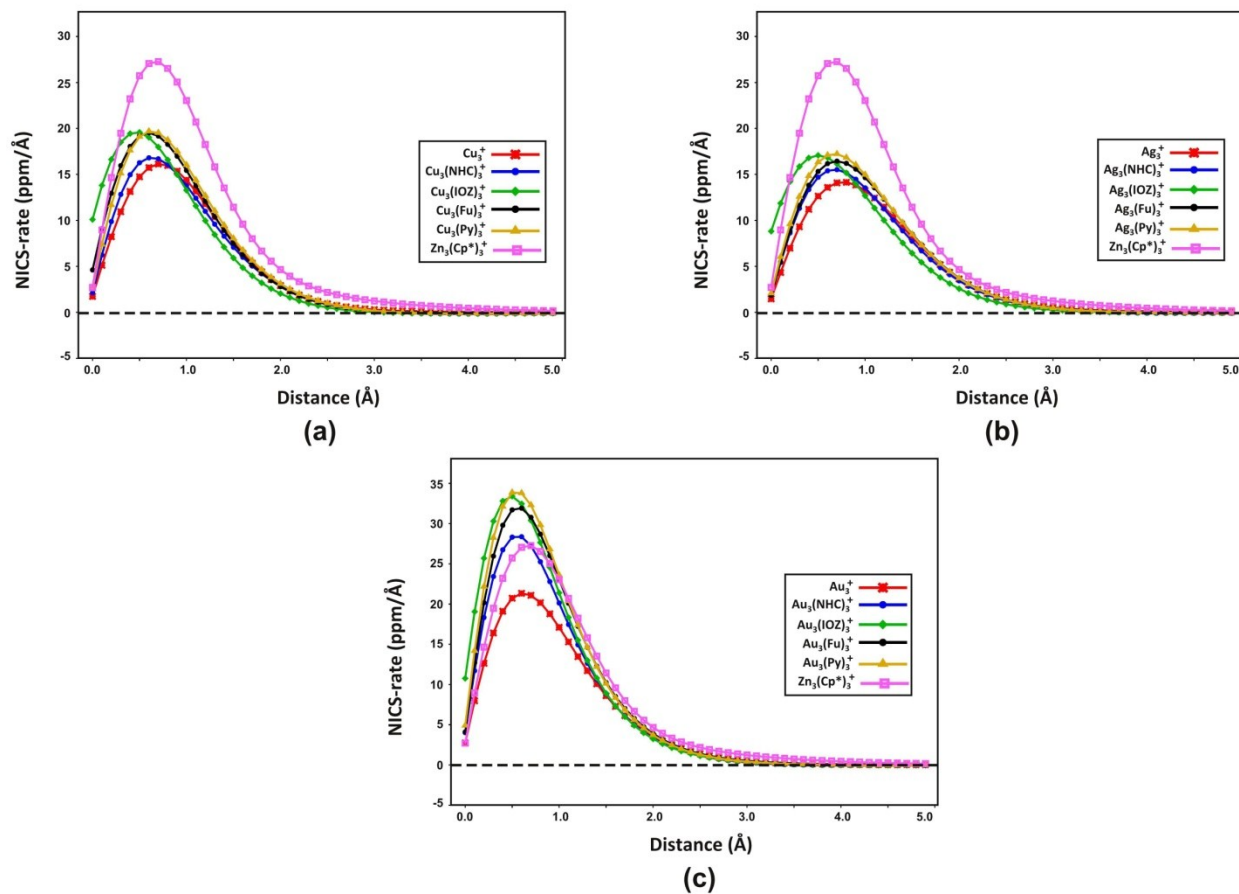

**Fig. 4-SI** NICS-rate plots for the  $M_3L_3^+$  complexes at the M06-2X/def2-TZVP level.

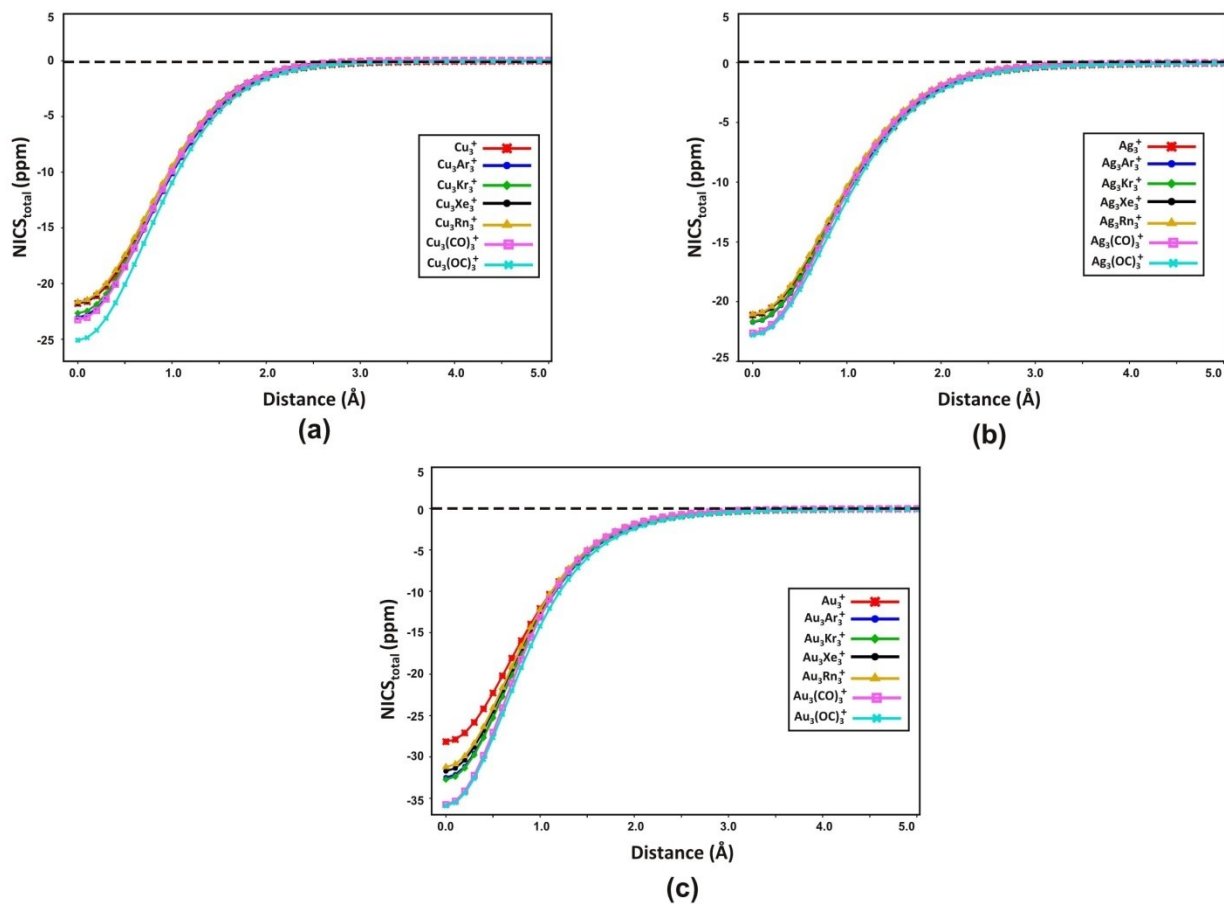

**Fig. 5-SI** NICS<sub>total</sub>-scan plots for the M<sub>3</sub>Ng<sub>3</sub><sup>+</sup>, M<sub>3</sub>(CO)<sub>3</sub><sup>+</sup> and M<sub>3</sub>(OC)<sub>3</sub><sup>+</sup> complexes at the M06-2X/def2-TZVP level.

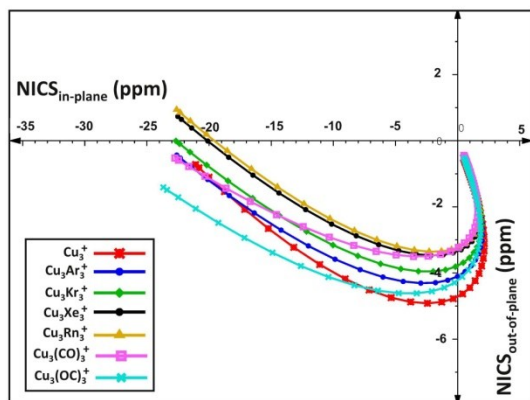

(a)

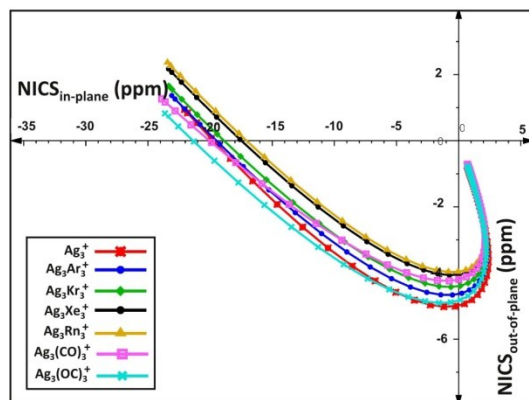

(b)

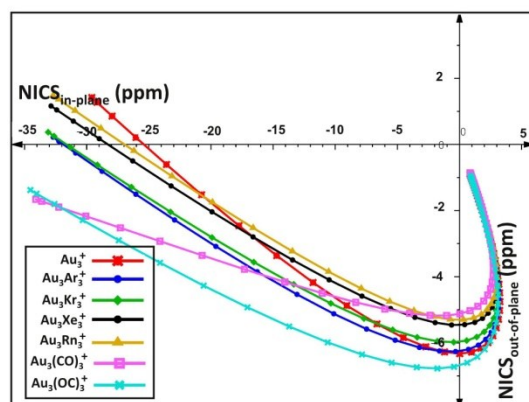

(c)

**Fig. 6-SI** FiPC-NICS plots for the  $M_3Ng_3^+$ ,  $M_3(CO)_3^+$  and  $M_3(OC)_3^+$  complexes at the M06-2X/def2-TZVP level.



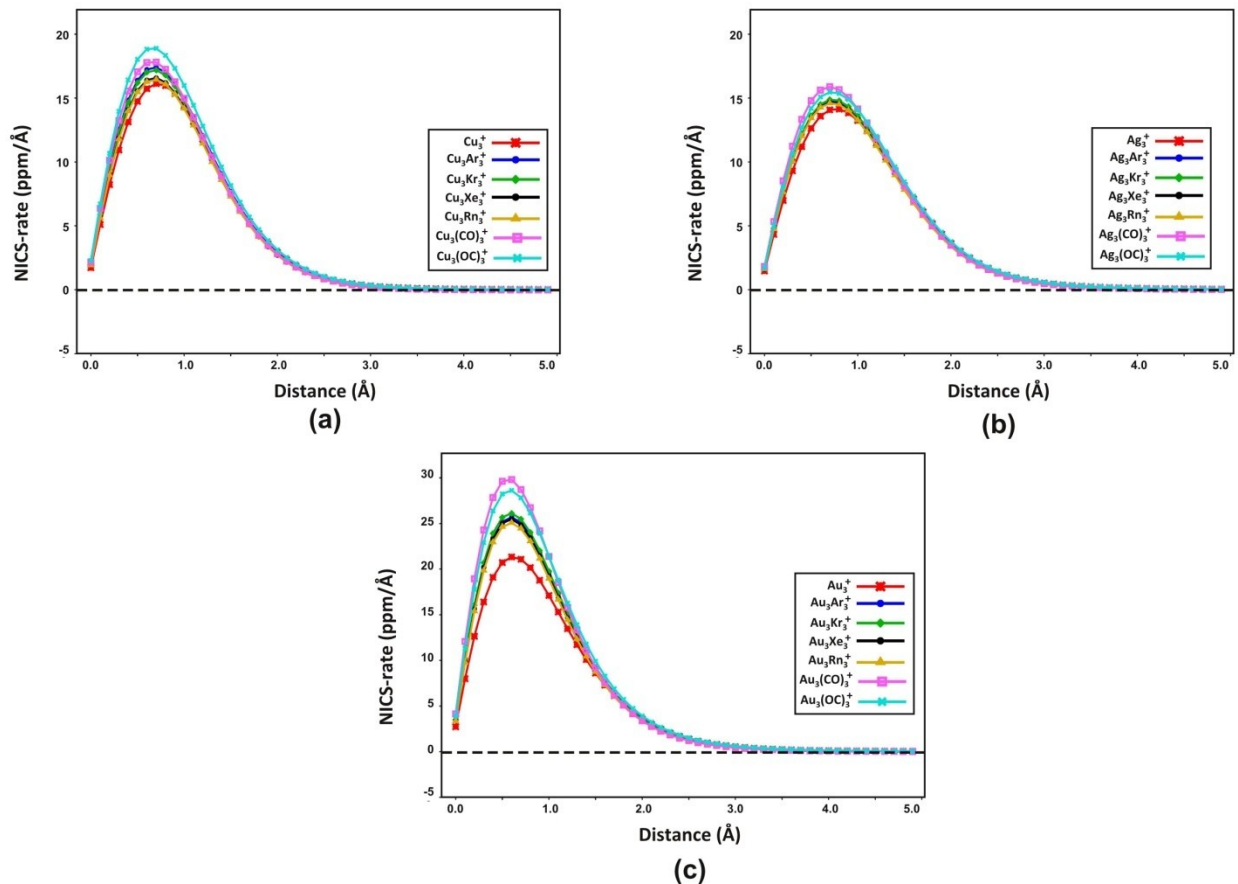

**Fig. 7-SI** NICS-rate plots for the  $M_3Ng_3^+$ ,  $M_3(CO)_3^+$  and  $M_3(OC)_3^+$  at the M06-2X/def2-TZVP level.

$Cu_3Ng_3^+$  and  $Ag_3Ng_3^+$  systems are close in  $NICS_{total}(0)$  and  $NICS_{total}(1)$  values to the corresponding bare units whereas  $Au_3Ng_3^+$  demonstrates increased  $NICS_{total}$  values (see Fig. 5-SI). The in-plane components of the NICS are the major contributors towards the total aromaticity in all these complexes (see Fig. 6-SI). NICS-rate plot shows that the size of the hump increases in  $M_3Ng_3^+$  compare to bare moieties (see Fig. 7-SI).

In general,  $M_3(OC)_3^+$  molecules show more  $NICS_{total}(0)$  values than that of the  $M_3(CO)_3^+$ , though the difference is small (see Fig. 5-SI). The in-plane components of the NICS increases noticeably in case of  $M_3(OC)_3^+$  (see Fig. 6-SI). NICS-rate plot shows increment in the hump size both in  $M_3(CO)_3^+$  and  $M_3(OC)_3^+$  in comparison to the  $M_3^+$  molecules (see Fig. 7-SI).
